# Supplementary material
Source: PubMed Central journal article supplement (PMC1446098)
Supplement: mbc_E05-11-1016_1.pdf [file mbc_E05-11-1016_1.pdf]

GFP-UNC-78

Actin

Merged

WT

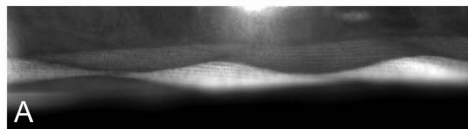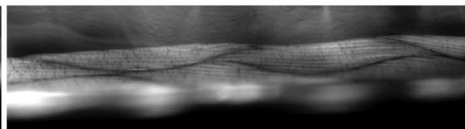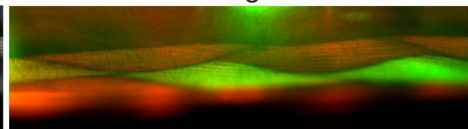

A

E126A

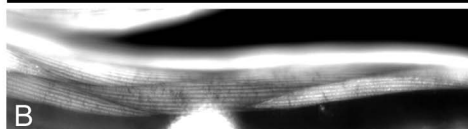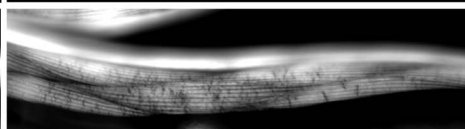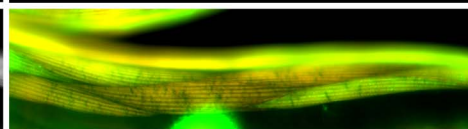

B

D168A

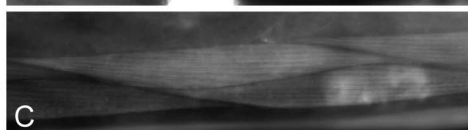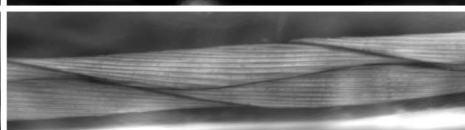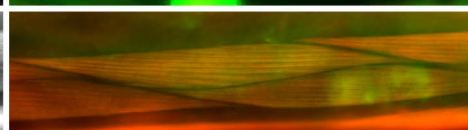

C

K181A

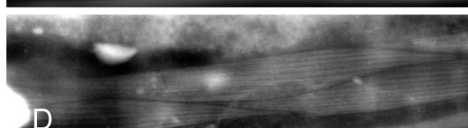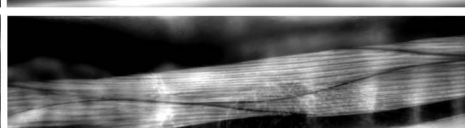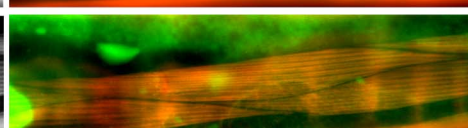

D

F182A

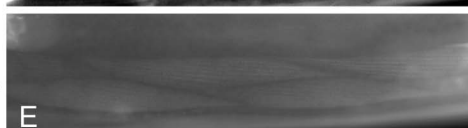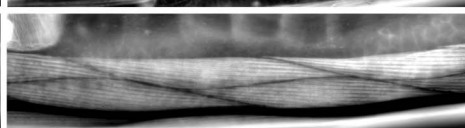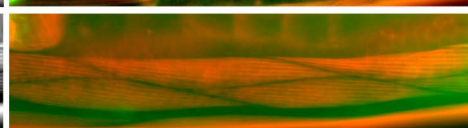

E

F192A

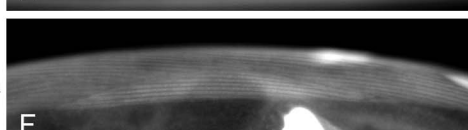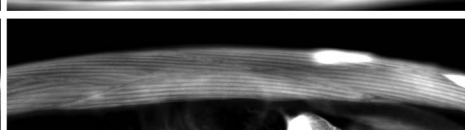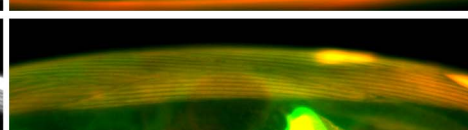

F

4x

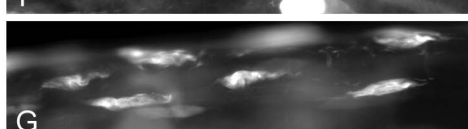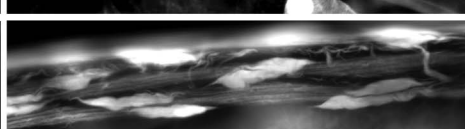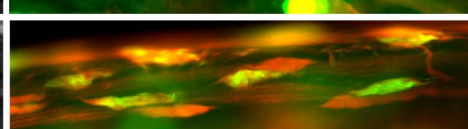

G

*unc-78(null)*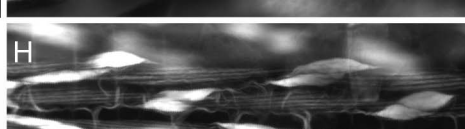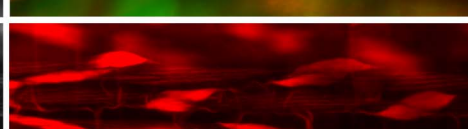

H

20μm

**Supplemental Figure 1.** GFP-UNC-78 with a quadruple mutation (E126A, D168A, F182A, and F192A) fails to rescue defects in the actin organization in the *unc-78(null)* mutant. Adult *unc-78(null)* worms that express GFP-UNC-78 were stained by tetramethylrhodamine-phalloidin to visualize organization of the actin filaments in the body wall muscle. Wild-type (A) or single mutants (B-F) rescued the striated organization of the actin filaments, while the 4X mutant did not (G). The *unc-78(null)* mutant without transgenic expression is shown in H. Bar, 20  $\mu\text{m}$ .
